# Supplementary material for: GDF11 slows excitatory neuronal senescence and brain ageing by repressing p21
Source: PubMed Central journal article supplement (PMC10656444; doi:10.1038/s41467-023-43292-1), 2023-11-17
Supplement: 41467_2023_43292_MOESM2_ESM.pdf [file 41467_2023_43292_MOESM2_ESM.pdf]

## Reporting Summary

Nature Portfolio wishes to improve the reproducibility of the work that we publish. This form provides structure for consistency and transparency in reporting. For further information on Nature Portfolio policies, see our [Editorial Policies](#) and the [Editorial Policy Checklist](#).

### Statistics

For all statistical analyses, confirm that the following items are present in the figure legend, table legend, main text, or Methods section.

- |                                     |                                                                                                                                                                                                                                                                                                |
|-------------------------------------|------------------------------------------------------------------------------------------------------------------------------------------------------------------------------------------------------------------------------------------------------------------------------------------------|
| n/a                                 | Confirmed                                                                                                                                                                                                                                                                                      |
| <input type="checkbox"/>            | <input checked="" type="checkbox"/> The exact sample size ( $n$ ) for each experimental group/condition, given as a discrete number and unit of measurement                                                                                                                                    |
| <input type="checkbox"/>            | <input checked="" type="checkbox"/> A statement on whether measurements were taken from distinct samples or whether the same sample was measured repeatedly                                                                                                                                    |
| <input type="checkbox"/>            | <input checked="" type="checkbox"/> The statistical test(s) used AND whether they are one- or two-sided<br><i>Only common tests should be described solely by name; describe more complex techniques in the Methods section.</i>                                                               |
| <input checked="" type="checkbox"/> | <input type="checkbox"/> A description of all covariates tested                                                                                                                                                                                                                                |
| <input type="checkbox"/>            | <input checked="" type="checkbox"/> A description of any assumptions or corrections, such as tests of normality and adjustment for multiple comparisons                                                                                                                                        |
| <input type="checkbox"/>            | <input checked="" type="checkbox"/> A full description of the statistical parameters including central tendency (e.g. means) or other basic estimates (e.g. regression coefficient) AND variation (e.g. standard deviation) or associated estimates of uncertainty (e.g. confidence intervals) |
| <input type="checkbox"/>            | <input checked="" type="checkbox"/> For null hypothesis testing, the test statistic (e.g. $F$ , $t$ , $r$ ) with confidence intervals, effect sizes, degrees of freedom and $P$ value noted<br><i>Give <math>P</math> values as exact values whenever suitable.</i>                            |
| <input checked="" type="checkbox"/> | <input type="checkbox"/> For Bayesian analysis, information on the choice of priors and Markov chain Monte Carlo settings                                                                                                                                                                      |
| <input checked="" type="checkbox"/> | <input type="checkbox"/> For hierarchical and complex designs, identification of the appropriate level for tests and full reporting of outcomes                                                                                                                                                |
| <input checked="" type="checkbox"/> | <input type="checkbox"/> Estimates of effect sizes (e.g. Cohen's $d$ , Pearson's $r$ ), indicating how they were calculated                                                                                                                                                                    |

Our web collection on [statistics for biologists](#) contains articles on many of the points above.

### Software and code

Policy information about [availability of computer code](#)

Data collection

CFX Manager software (Version 3.0)  
Cuffdiff (v2.2.1) <http://cole-trapnell-lab.github.io/cufflinks/cuffdiff/>  
Tophat (v2.1.1) <http://ccb.jhu.edu/software/tophat/index.shtml>  
R (Version 3.6.0) <https://www.r-project.org/>

Data analysis

GraphPad Prism 8.0 <https://www.graphpad.com/scientific-software/prism/>  
ImageJ <https://imagej.nih.gov/ij/>  
Adobe Photoshop CC 2018  
Adobe Illustrator CC 2018  
FV10-ASW 4.2 Viewer  
CFX Manager software (Version 3.0)  
Cuffdiff (v2.2.1) <http://cole-trapnell-lab.github.io/cufflinks/cuffdiff/>  
Tophat (v2.1.1) <http://ccb.jhu.edu/software/tophat/index.shtml>  
R (Version 3.6.0) <https://www.r-project.org/>  
PISA (v0.2) <https://github.com/shiquan/PISA>

For manuscripts utilizing custom algorithms or software that are central to the research but not yet described in published literature, software must be made available to editors and reviewers. We strongly encourage code deposition in a community repository (e.g. GitHub). See the Nature Portfolio [guidelines for submitting code & software](#) for further information.

## Data

Policy information about [availability of data](#)

All manuscripts must include a [data availability statement](#). This statement should provide the following information, where applicable:

- Accession codes, unique identifiers, or web links for publicly available datasets
- A description of any restrictions on data availability
- For clinical datasets or third party data, please ensure that the statement adheres to our [policy](#)

The RNA-seq data generated in this study have been deposited in the GEO database under accession code GSE167538 [<https://www.ncbi.nlm.nih.gov/geo/query/acc.cgi?acc=GSE167538>].

The snRNA-seq data generated in this study have been deposited in the China National GeneBank (CNGB) database under accession code CNGB: CNP0003558 [<https://db.cngb.org/search/project/CNP0003558/>].

Code for snRNA-seq analysis [<https://github.com/changhuizhong/GitCode.git>] is available.

The statistical data generated in this study are provided in the Source Data file.

The datasets generated during the current study are available from the corresponding author.

## Human research participants

Policy information about [studies involving human research participants and Sex and Gender in Research](#).

Reporting on sex and gender

Sex was not considered in this study design and methods.

Population characteristics

Six human samples were used in this study to avoid the possible variation. Two patients, aged 23 (female) and 24 (male) years respectively, who were diagnosed with intractable epilepsy and the focus of epilepsy had to be removed surgically. In addition, the frontal lobe tissues were obtained from other four patients, aged 23 (male), 52 (male), 54 (female) and 60 (male) years, respectively, who were suffering acute traumatic brain injury.

Recruitment

Human brain tissues were obtained from the First Affiliated Hospital, Zhejiang University School of Medicine.

Ethics oversight

The studies were approved by Medical Ethics Review Committee of Zhejiang University School of Medicine (ETHICS number : IIT20220453B).

Note that full information on the approval of the study protocol must also be provided in the manuscript.

## Field-specific reporting

Please select the one below that is the best fit for your research. If you are not sure, read the appropriate sections before making your selection.

- Life sciences  Behavioural & social sciences  Ecological, evolutionary & environmental sciences

For a reference copy of the document with all sections, see [nature.com/documents/nr-reporting-summary-flat.pdf](https://www.nature.com/documents/nr-reporting-summary-flat.pdf)

## Life sciences study design

All studies must disclose on these points even when the disclosure is negative.

Sample size

No sample size calculation was performed to predetermine sample size. Sample size was determined according to the previous experimental observations and guidance in the field:

- 1) Cell stem cell 25, 514-530 e518, (2019). <https://pubmed.ncbi.nlm.nih.gov/31543366/>
- 2) Nat Aging 3, 213-228, (2023). <https://pubmed.ncbi.nlm.nih.gov/37118117/>

Data exclusions

No data were excluded from the analyses.

Replication

All the data in this study are representative of at least three experiments, unless otherwise statements. Experiments were performed independently.

Randomization

Samples/organisms/participants were allocated into experimental groups randomly.

Blinding

The investigators were blinded to group allocation during data collection and analysis.

# Reporting for specific materials, systems and methods

We require information from authors about some types of materials, experimental systems and methods used in many studies. Here, indicate whether each material, system or method listed is relevant to your study. If you are not sure if a list item applies to your research, read the appropriate section before selecting a response.

## Materials & experimental systems

| n/a                                 | Involvement                         | Material/System               |
|-------------------------------------|-------------------------------------|-------------------------------|
| <input type="checkbox"/>            | <input checked="" type="checkbox"/> | Antibodies                    |
| <input type="checkbox"/>            | <input checked="" type="checkbox"/> | Eukaryotic cell lines         |
| <input checked="" type="checkbox"/> | <input type="checkbox"/>            | Palaeontology and archaeology |
| <input type="checkbox"/>            | <input checked="" type="checkbox"/> | Animals and other organisms   |
| <input checked="" type="checkbox"/> | <input type="checkbox"/>            | Clinical data                 |
| <input checked="" type="checkbox"/> | <input type="checkbox"/>            | Dual use research of concern  |

## Methods

| n/a                                 | Involvement              | Method                 |
|-------------------------------------|--------------------------|------------------------|
| <input checked="" type="checkbox"/> | <input type="checkbox"/> | ChIP-seq               |
| <input checked="" type="checkbox"/> | <input type="checkbox"/> | Flow cytometry         |
| <input checked="" type="checkbox"/> | <input type="checkbox"/> | MRI-based neuroimaging |

## Antibodies

### Antibodies used

- 1) Mouse anti-GDF11, R&D Systems Cat#MAB19581, 1:200; RRID: AB\_2877166
- 2) Mouse anti-GDF11, Santa Cruz Cat#sc-81952, 1:200; RRID: AB\_2279007
- 3) Rabbit anti-GDF11, Abcam Cat#ab124721, 1:200; RRID: AB\_10974143
- 4) Rabbit anti-GDF11, Novus Cat# NBP1-95888, 1:200; RRID: AB\_11059784
- 5) Mouse anti-β-actin, Sigma-Aldrich Cat#A5441, 1:10000; RRID: AB\_476744
- 6) Mouse anti-Myc, Cell Signaling Cat#2276, 1:2000; RRID: AB\_331783
- 7) Guinea pig anti-NeuN Millipore Cat#ABN90, 1:1000; RRID: AB\_11205592
- 8) Rabbit anti- CaMKIIα Abcam Cat#ab131468, 1:500; RRID: AB\_11157799
- 9) Rabbit anti-GABA Sigma-Aldrich Cat#A2052, 1:500; RRID: AB\_477652
- 10) Rabbit anti-Olig2 Millipore Cat#AB9610, 1:200; RRID: AB\_570666
- 11) Chicken anti-GFAP Millipore Cat#AB5541, 1:1000; RRID: AB\_177521
- 12) Rabbit anti-Iba1 WAKO Cat# 019-19741, 1:500; RRID: AB\_839504
- 13) Goat anti-Doublecortin (DCX) Santa Cruz Cat#sc-8066, 1:1000; RRID: AB\_2088494
- 14) Rabbit anti-p21 Waf1/Cip1 Cell Signaling Cat# 2947, 1:200; RRID: AB\_823586
- 15) Rabbit anti Tmem159 Biorbyt Cat#orb351361, 1:1000;
- 16) Rabbit anti pSmad2 Cell Signaling Cat#3108, 1:1000; RRID: AB\_490941
- 17) Rabbit anti Smad2 Cell Signaling, Cat#5339, 1:2000; RRID: AB\_10626777
- 18) Rabbit anti Smad3 Cell Signaling, Cat#9513, 1:2000; RRID: AB\_2286450
- 19) CyTM3 affininipure donkey anti-rabbit IgG (H+L) Jackson ImmunoResearch Cat#711-165-152, 1:500; RRID: AB\_2307443
- 20) CyTM3 affininipure donkey anti- guinea pig IgG (H+L) Jackson ImmunoResearch Cat#706-165-148, 1:500; RRID: AB\_2340460
- 21) CyTM3 affininipure donkey anti- chicken IgG (H+L) Jackson ImmunoResearch Cat#703-165-155, 1:500; RRID: AB\_2340363
- 22) CyTM3 affininipure donkey anti-goat IgG (H+L) Jackson ImmunoResearch Cat#705-165-147, 1:500; RRID: AB\_2307351
- 23) Alexa Fluor® 488 affininipure donkey anti-mouse IgG(H+L) Jackson ImmunoResearch Cat#715-545-151, 1:500; RRID: AB\_2341099
- 24) Alexa Fluor® 488 affininipure donkey anti- guinea pig IgG(H+L) Jackson ImmunoResearch Cat#706-545-148, 1:500; RRID: AB\_2340472
- 25) Alexa Fluor® 488 affininipure donkey anti-rabbit IgG (H+L) Jackson ImmunoResearch Cat#711-545-152, 1:500; RRID: AB\_2313584
- 26) Peroxidase affininipure donkey anti-rabbit IgG (H+L) Jackson ImmunoResearch Cat#711-035-152, 1:500; RRID: AB\_10015282
- 27) Peroxidase affininipure donkey anti-mouse IgG (H+L) Jackson ImmunoResearch Cat#715-035-151, 1:500; RRID: AB\_2340771
- 28) Nanogold®-IgG goat anti mouse IgG (H+L) Nanoprobes, Cat# 2001-1.0 mL, 1:100; RRID: AB\_2877644

### Validation

All the primary antibodies in this paper were obtained from the manufacturer with validation and citations.

Validation of the antibodies used in this study:

- 1) Mouse anti-GDF11, R&D Systems Cat#MAB19581; RRID: AB\_2877166. This antibody was systematically characterized in this study: see this paper in details. REF: PMID: 31133057. [https://www.rndsystems.com/cn/products/human-gdf-11-bmp-11-antibody-743833\\_mab19581](https://www.rndsystems.com/cn/products/human-gdf-11-bmp-11-antibody-743833_mab19581)
- 2) Mouse anti-GDF11, Santa Cruz Cat#sc-81952; RRID: AB\_2279007, REF: PMID: 30726519. <https://www.scbt.com/p/gdf-11-antibody-x-19>
- 3) Rabbit anti-GDF11, Abcam Cat#ab124721; RRID: AB\_10974143, REF: PMID: 31148205. <https://www.abcam.cn/products/primary-antibodies/gdf11--gdf8myostatin-antibody-epr45672-ab124721.html>
- 4) Rabbit anti-GDF11, Novus Cat# NBP1-95888; RRID: AB\_11059784. Application: immunofluorescence and immunohistochemistry in this paper. [https://www.novusbio.com/products/gdf-11-bmp-11-antibody-epr4567-2-\\_nbp1-95888](https://www.novusbio.com/products/gdf-11-bmp-11-antibody-epr4567-2-_nbp1-95888)
- 5) Mouse anti-β-actin, Sigma-Aldrich Cat#A5441; RRID: AB\_476744, REF: PMID17185421. <https://www.sigmaaldrich.cn/CN/zh/product/sigma/a5441>
- 6) Mouse anti-Myc, Cell Signaling Cat#2276; RRID: AB\_331783, REF: PMID: 33372599. <https://www.cellsignal.cn/products/primary-antibodies/myc-tag-9b11-mouse-mab/2276>
- 7) Guinea pig anti-NeuN, Millipore Cat#ABN90; RRID: AB\_11205592, REF: PMID32876565. <https://www.sigmaaldrich.cn/CN/zh/product/mm/abn90>

- 8) Rabbit anti- CaMKII $\alpha$ , Abcam Cat#ab131468; RRID: AB\_11157799, REF: PMID: 30387713. <https://www.abcam.cn/products/primary-antibodies/camkii-alpha-antibody-ab131468.html>
- 9) Rabbit anti-GABA, Sigma-Aldrich Cat#A2052; RRID: AB\_477652, REF: PMID: 28445462. <https://www.sigmaaldrich.cn/CN/zh/product/sigma/a2052>
- 10) Rabbit anti-Olig2, Millipore Cat#AB9610; RRID: AB\_570666, REF: PMID: 21782903. <https://www.sigmaaldrich.cn/CN/zh/product/mm/ab9610>
- 11) Chicken anti-GFAP, Millipore Cat#AB5541; RRID: AB\_177521, REF: PMID: 27023006. <https://www.sigmaaldrich.cn/CN/zh/product/mm/ab5541>
- 12) Rabbit anti-Iba1, WAKO Cat# 019-19741; RRID: AB\_839504, REF: PMID: 18022954. <http://www.biodee.net/Show/index/cid/87/id/60470.html>
- 13) Goat anti-Doublecortin (DCX), Santa Cruz Cat#sc-8066; RRID: AB\_2088494, REF: PMID: 16786555. <https://www.scbt.com/p/doublecortin-antibody-c-18?requestFrom=search>
- 14) Rabbit anti-p21 Waf1/Cip1, Cell Signaling Cat# 2947; RRID: AB\_823586, REF: PMID: 33360689. <https://www.cellsignal.cn/products/primary-antibodies/p21-waf1-cip1-12d1-rabbit-mab/2947>
- 15) Rabbit anti Tmem159, Biorbyt Cat#orb351361. <https://www.biorbyt.com/tmem159-antibody-orb351361.html>
- 16) Rabbit anti pSmad2, Cell Signaling Cat#3108; RRID: AB\_490941, REF: PMID: 33149148. <https://www.cellsignal.cn/products/primary-antibodies/phospho-smad2-ser465-467-138d4-rabbit-mab/3108>
- 17) Rabbit anti Smad2, Cell Signaling, Cat#5339; RRID: AB\_10626777, REF: PMID: 32928102. <https://www.cellsignal.cn/products/primary-antibodies/sm2-d43b4-xp-rabbit-mab/5339>
- 18) Rabbit anti Smad3, Cell Signaling, Cat#9513; RRID: AB\_2286450, REF: PMID: 35766589. <https://www.cellsignal.cn/products/primary-antibodies/sm3-antibody/9513>

## Eukaryotic cell lines

Policy information about [cell lines and Sex and Gender in Research](#)

|                                                                      |                                                                                     |
|----------------------------------------------------------------------|-------------------------------------------------------------------------------------|
| Cell line source(s)                                                  | HEK293T from ATCC<br>Neuro-2a from ATCC                                             |
| Authentication                                                       | All cell lines were validated based on the morphology and STR profiling before use. |
| Mycoplasma contamination                                             | HEK293T and Neuro-2a cell lines are tested negative for mycoplasma contamination.   |
| Commonly misidentified lines<br>(See <a href="#">ICLAC</a> register) | No commonly misidentified cell lines were used in the study                         |

## Animals and other research organisms

Policy information about [studies involving animals; ARRIVE guidelines](#) recommended for reporting animal research, and [Sex and Gender in Research](#)

|                         |                                                                                                                                                                                                                                                                                                                                                                                                                                                                                                                                                                                                                                                                                                                                                                                                                                                                                                                                                                                        |
|-------------------------|----------------------------------------------------------------------------------------------------------------------------------------------------------------------------------------------------------------------------------------------------------------------------------------------------------------------------------------------------------------------------------------------------------------------------------------------------------------------------------------------------------------------------------------------------------------------------------------------------------------------------------------------------------------------------------------------------------------------------------------------------------------------------------------------------------------------------------------------------------------------------------------------------------------------------------------------------------------------------------------|
| Laboratory animals      | <ol style="list-style-type: none"> <li>1) Aged of 3 months-old male mouse: C57BL/6J from Shanghai Slac Laboratory</li> <li>2) Aged of 3 months, 9 months and 36 months-old male mouse: CD-1<sup>®</sup>(ICR) IGS from Zhejiang Academy of Medical Sciences</li> <li>3) Mouse: GDF11f/f was originally generated in this paper</li> <li>4) Mouse: CaMKII<math>\alpha</math>-Cre; GDF11f/f (GDF11cKO) obtained through crossing the two lines in this paper</li> <li>5) Mouse: p21f/f was generated in this paper</li> <li>6) Mouse: CaMKII<math>\alpha</math>-Cre; GDF11f/f ;p21f/f was generated in this paper</li> <li>7) Two female common marmosets (Callithrix jacchus, 260g aged 62M and 245g aged 70M) from Li-Xia Gao Lab in Zhejiang University.</li> </ol> <p>Mice were housed in an environment of suitable temperature (25 °C) and humidity (typically 50%) under a 12 h light-dark cycle (light on from 7 a.m. to 7 p.m.) with accessing to food and water ad libitum.</p> |
| Wild animals            | The study did not involve wild animals.                                                                                                                                                                                                                                                                                                                                                                                                                                                                                                                                                                                                                                                                                                                                                                                                                                                                                                                                                |
| Reporting on sex        | Sex was not considered in this study design and methods.                                                                                                                                                                                                                                                                                                                                                                                                                                                                                                                                                                                                                                                                                                                                                                                                                                                                                                                               |
| Field-collected samples | This study did not involve samples collected from the field.                                                                                                                                                                                                                                                                                                                                                                                                                                                                                                                                                                                                                                                                                                                                                                                                                                                                                                                           |
| Ethics oversight        | <p>The studies with mice were approved by Medical Ethics Review Committee of Zhejiang University School of Medicine (ETHICS number: 14660).</p> <p>The studies with common marmosets were approved by Medical Ethics Review Committee of Zhejiang University School of Medicine (ETHICS number: ZJU20210053).</p>                                                                                                                                                                                                                                                                                                                                                                                                                                                                                                                                                                                                                                                                      |

Note that full information on the approval of the study protocol must also be provided in the manuscript.
